# Supplementary material for: Prevalence of NRAS Mutation, PD‐L1 Expression and Amplification, and Overall Survival Analysis in 36 Primary Vaginal Melanomas
Source: PubMed Central journal article supplement — Oncologist. 2019 Oct 2;25(2):e291–301. doi: 10.1634/theoncologist.2019-0148 (PMC7011659; doi:10.1634/theoncologist.2019-0148), 2019-10-02

Supplemental Figure for:

Prevalence of NRAS mutation, PD-L1 expression/amplification and overall survival analysis in 36 primary vaginal melanomas  
Fang Wang et al.

**Supplementary Figure 1.** Sequencing electropherograms of mutated genes for *NRAS* with p.Q61P (a) and p.Q61R mutations (b), *KIT* with p.V559D mutation (c), and *TERT* with c.C250T mutation (d).

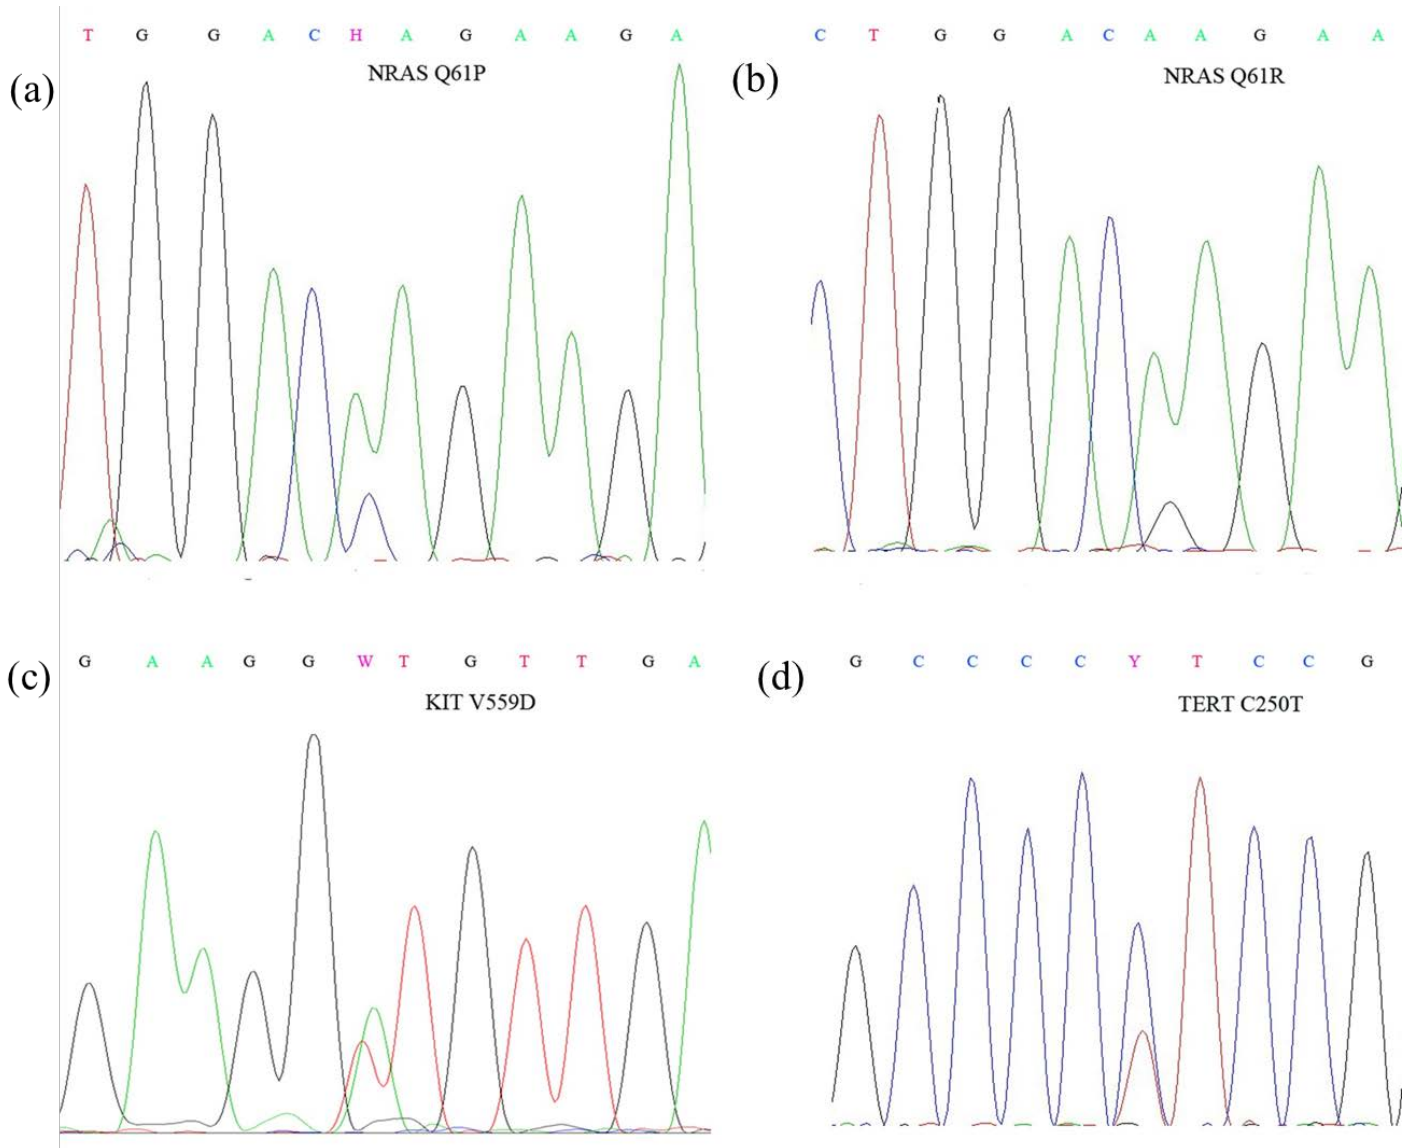

Supplement: ONCO-25-e291-s001.pdf [file ONCO-25-e291-s001.pdf]
