# Supplementary material for: Prevalence of NRAS Mutation, PD‐L1 Expression and Amplification, and Overall Survival Analysis in 36 Primary Vaginal Melanomas
Source: PubMed Central journal article supplement — Oncologist. 2019 Oct 2;25(2):e291–301. doi: 10.1634/theoncologist.2019-0148 (PMC7011659; doi:10.1634/theoncologist.2019-0148), 2019-10-02
Supplement: ONCO-25-e291-s002.pdf [file ONCO-25-e291-s002.pdf]

Supplemental Tables for:

Prevalence of NRAS mutation, PD-L1 expression/amplification and overall survival analysis in 36 primary vaginal melanomas  
Fang Wang et al.

**Supplementary Table 1.** Medical records showing the subsequent treatment in patients with primary vaginal melanoma after surgery

| Case No. | Subsequent treatment       | Medicine                                          |
|----------|----------------------------|---------------------------------------------------|
| 1        | None                       |                                                   |
| 2        | Operation                  |                                                   |
| 3        | Chemotherapy               | DTIC+Cisplatin                                    |
| 4        | Operation, Chemotherapy    | DTIC                                              |
| 5        | Chemotherapy               | Temozolomid+Nedaplatin,<br>Paclitaxel+Carboplatin |
| 6        | Operation, Chemotherapy    | Cisplatin+Vincristine+Interferon                  |
| 7        | None                       | None                                              |
| 8        | Chemotherapy               | DTIC+Cisplatin+Vincristine                        |
| 9        | Chemotherapy, Radiotherapy | DTIC+Ifosfamide+Epirubicin                        |
| 10       | Chemotherapy, Radiotherapy | Temozolomid+Nedaplatin                            |
| 11       | Chemotherapy               | DTIC+Cisplatin+Vincristine                        |
| 12       | Chemotherapy               | DTIC+Cisplatin+Vincristine                        |
| 13       | Radiotherapy               |                                                   |
| 14       | Radiotherapy               |                                                   |
| 15       | Interferon-alpha           | Interferon-alpha                                  |
| 16       | Chemotherapy, Radiotherapy | Temozolomid+Cisplatin                             |
| 17       | Chemotherapy, Radiotherapy | Interferon-alpha                                  |
| 18       | Chemotherapy, Radiotherapy | DTIC                                              |

|    |                               |                                                            |
|----|-------------------------------|------------------------------------------------------------|
| 19 | None                          |                                                            |
| 20 | Radiotherapy                  |                                                            |
| 21 | Immunotherapy                 | Nivolumab, Pembrolizumab                                   |
| 22 | Chemotherapy+Targeted therapy | Paclitaxel +Bevacizumab                                    |
| 23 | None                          |                                                            |
| 24 | Chemotherapy                  | Temozolomid,<br>Paclitaxel+Carboplatin                     |
| 25 | Radiotherapy, Chemotherapy    | Temozolomid                                                |
| 26 | Chemotherapy, Operation       | Cisplatin+DTIC                                             |
| 27 | Chemotherapy                  | Temozolomid+Lobaplatin                                     |
| 28 | Radiotherapy                  |                                                            |
| 29 | Chemotherapy, Immunotherapy   | Temozolomid+Cisplatin,<br>Nivolumab                        |
| 30 | Chemotherapy                  | Temozolomid+Lobaplatin, DTIC                               |
| 31 | None                          |                                                            |
| 32 | Radiotherapy, Chemotherapy    | Temozolomid                                                |
| 33 | None                          |                                                            |
| 34 | Radiotherapy, Chemotherapy    | Temozolomid,<br>Paclitaxel+Carboplatin,<br>DTIC+Lobaplatin |
| 35 | None                          |                                                            |
| 36 | None                          |                                                            |

---

Abbreviations: DTIC, Dacarbazine.

**Supplementary Table 2.** Primer sequences for mutation detection using Sanger sequencing

| Genes       | Exons    | Primer's sequences                       |
|-------------|----------|------------------------------------------|
| <i>KIT</i>  | Exon9    | Forward 5'-AGCCAGGGCTTTTGTCT-3'          |
|             |          | Reverse 5'-TGGTAGACAGAGCCTAAACATCC-3'    |
|             | Exon11   | Forward 5'-CCAGAGTGCTCTAATGACTG-3'       |
|             |          | Reverse 5'-ACCCAAAAGGTGACATGGA-3'        |
|             | Exon13   | Forward 5'-CGGCCATGACTGTCGCTGTAA-3'      |
|             |          | Reverse 5'-CTCCAATGGTGCAGGCTCCAA-3'      |
|             | Exon17   | Forward 5'-ATGGTTTTCTTTCTCCTCC-3'        |
|             |          | Reverse 5'-CAGGACTGTCAAGCAGAGAAT-3'      |
| <i>NRAS</i> | Exon2    | Forward 5'-CAACAGGTTCTTGCTGGTGT-3'       |
|             |          | Reverse 5'-CCTCACCTCTATGGTGGGAT-3'       |
|             | Exon3    | Forward 5'-GATTCTTACAGAAAACAAGTG-3'      |
|             |          | Reverse 5'-ATGACTTGCTATTATTGATGG-3'      |
| <i>TERT</i> | Promoter | Forward 5'-ACGAACGTGGCCAGCGGCAG-3'       |
|             |          | Reverse 5'-CTGGCGTCCCTGCACCCTGG-3'       |
| <i>GNAQ</i> | Exon4    | Forward 5'-TGTCCTCCCTTTCCGTAGA-3'        |
|             |          | Reverse 5'-TGGGAAATAGGTTTCATGGACT-3'     |
|             | Exon5    | Forward 5'-ATAATCCATTGCCTGTCTAAAGAACA-3' |

|       |         |                                |
|-------|---------|--------------------------------|
|       | Reverse | 5'-TGTTAACCTTGCAGAATGGTCGAT-3' |
| Exon4 | Forward | 5' -GCTGGTTTGGGTGCTGTGT-3'     |
|       | Reverse | 5' -GGCAAATGAGCCTCTCAGTG-3'    |
| Exon5 | Forward | 5'-CCGTCCTGGGATTGCAGATT-3'     |
|       | Reverse | 5'-TTGGTCGTATTCGCTGAGGG-3'     |

---

**Supplementary Table 3.** The association of the *NRAS* mutation status and *PD-L1* status to patients' clinicopathological characteristics

| Variable                                   | No. | Wild <i>NRAS</i> (%) | Mutated <i>NRAS</i> (%) | P*    | <i>PD-L1</i> - (%) | <i>PD-L1</i> + (%) | P*    |
|--------------------------------------------|-----|----------------------|-------------------------|-------|--------------------|--------------------|-------|
| <b>Age, years</b>                          |     |                      |                         |       |                    |                    |       |
| ≤60                                        | 25  | 21 (84.0)            | 4 (16.0)                | 0.664 | 21 (84.0)          | 4 (16.0)           | 0.008 |
| >60                                        | 11  | 10 (90.9)            | 1 (9.1)                 |       | 4 (36.4)           | 7 (63.6)           |       |
| <b>Tumor phenotype</b>                     |     |                      |                         |       |                    |                    |       |
| Superficial spreading                      | 2   | 1 (50.0)             | 1 (50.0)                | 0.279 | 1 (50.0)           | 1 (50.0)           | 1.000 |
| Nodular                                    | 32  | 28 (87.5)            | 4 (12.5)                |       | 22 (68.8)          | 10 (31.2)          |       |
| Unknown                                    | 2   | 2 (100.0)            | 0 (0.0)                 |       | 2 (100.0)          | 0 (0.0)            |       |
| <b>Ulceration</b>                          |     |                      |                         |       |                    |                    |       |
| Absent                                     | 17  | 15 (88.2)            | 2 (11.8)                | 0.555 | 11 (64.7)          | 6 (35.3)           | 0.721 |
| Present                                    | 19  | 16 (84.2)            | 3 (15.8)                |       | 14 (73.7)          | 5 (26.3)           |       |
| <b>Cellularity</b>                         |     |                      |                         |       |                    |                    |       |
| Epitheloid                                 | 28  | 24 (85.7)            | 4 (14.3)                | 0.695 | 20 (71.4)          | 8 (28.6)           | 0.444 |
| Spindle-cell                               | 5   | 4 (80.0)             | 1 (20.0)                |       | 4 (80.0)           | 1 (20.0)           |       |
| Mixed                                      | 3   | 3 (100.0)            | 0 (0.0)                 |       | 1 (33.3)           | 2 (66.7)           |       |
| <b>Pigmentation</b>                        |     |                      |                         |       |                    |                    |       |
| Absent                                     | 3   | 3 (100.0)            | 0 (0.0)                 | 0.630 | 2 (66.7)           | 1 (33.3)           | 1.000 |
| Present                                    | 33  | 28 (84.8)            | 5 (15.2)                |       | 23 (69.7)          | 10 (30.3)          |       |
| <b>Mitotic activity (n/mm<sup>2</sup>)</b> |     |                      |                         |       |                    |                    |       |
| 0                                          | 4   | 3 (75.0)             | 1 (25.0)                | 0.649 | 3 (75.0)           | 1 (25.0)           | 0.466 |
| 1-9                                        | 15  | 13 (86.7)            | 2 (13.3)                |       | 12 (80.0)          | 3 (20.0)           |       |
| ≥10                                        | 17  | 15 (88.2)            | 2 (11.8)                |       | 10 (58.8)          | 7 (41.2)           |       |
| <b>Breslow thickness (mm)</b>              |     |                      |                         |       |                    |                    |       |

|                   |    |           |          |       |           |          |       |
|-------------------|----|-----------|----------|-------|-----------|----------|-------|
| ≤4.0              | 6  | 6 (100.0) | 0 (0.0)  | 0.679 | 4 (66.7)  | 2 (33.3) | 0.830 |
| >4.0              | 28 | 23 (82.1) | 5 (17.9) |       | 20 (71.4) | 8 (28.6) |       |
| Unknown           | 2  | 2 (100.0) | 0 (0.0)  |       | 1 (50.0)  | 1 (50.0) |       |
| <b>AJCC Stage</b> |    |           |          |       |           |          |       |
| I                 | 2  | 2 (100.0) | 0 (0.0)  | 0.809 | 0 (0.0)   | 2 (100)  | 0.163 |
| II                | 22 | 19 (86.4) | 3 (13.6) |       | 16 (72.7) | 6 (27.3) |       |
| III               | 10 | 8 (80.0)  | 2 (20.0) |       | 8 (80.0)  | 2 (20.0) |       |
| Unknown           | 2  | 2 (100.0) | 0 (0.0)  |       | 1 (50.0)  | 1 (50.0) |       |

\*P values (two-sided) calculated using Pearson's chi-square test or Fisher's test.

Abbreviations: *PD-L1+*, Programmed death-ligand 1, denotes *PD-L1* positive staining and amplification; *PD-L1-* indicates no staining.

**Supplementary Table 4.** Review of previous original reports on the molecular alterations of primary vaginal melanoma

| Reference             | Number of cases | Methods                           | <i>NRAS</i>  | <i>CKIT</i>  | <i>BRAF</i> | <i>KRAS</i> | <i>PD-L1</i> expression* |
|-----------------------|-----------------|-----------------------------------|--------------|--------------|-------------|-------------|--------------------------|
| Torres-Cabala, 2009   | 4               | Sanger sequencing                 | NA           | 25.0% (1/4)  | NA          | NA          |                          |
| Omholt, 2011          | 7               | Sanger sequencing                 | 43% (3/7)    | 0 (0/7)      | 0 (0/7)     | NA          |                          |
| Aulimanm, 2014        | 15              | Sanger sequencing                 | 13.3% (2/15) | 0 (0/15)     | 0 (0/15)    | NA          |                          |
| Van Engen-van, 2014   | 14              | Sanger sequencing                 | 21.4% (3/14) | 4.2% (1/24)  | 0 (0/14)    | NA          |                          |
| Rouzbahman, 2015      | 5               | Next-generation sequencing        | 0 (0/4)      | 0 0 (0/4)    | 0 (0/4)     | NA          |                          |
| Hou, 2017             | 14              | Next-generation Sanger sequencing | 16.7% (1/6)  | 8.3% (1/12)  | 23.1 (3/13) | NA          |                          |
| Banafsheh Saleh, 2018 | 13              | Sanger sequencing<br>IHC          | 7.7% (1/13)  | 30.8% (4/13) | 0 (0/13)    | 7.7% (1/13) | 69.2% (9/13)             |

---

\* indicating that 1% or more *PD-L1* membrane staining (*PD-L1* antibody: clone 22C3, pharmDX, Dako, Hamburg, Germany) in tumor cells were considered positive. Abbreviations: *PD-L1*, Programmed death-ligand 1; IHC, immunohistochemistry.
